# Supplementary material
Source: PubMed Central journal article supplement (PMC4761857)
Supplement: Supp_Fig1.pdf [file Supp_Fig1.pdf]

## Supplementary Data

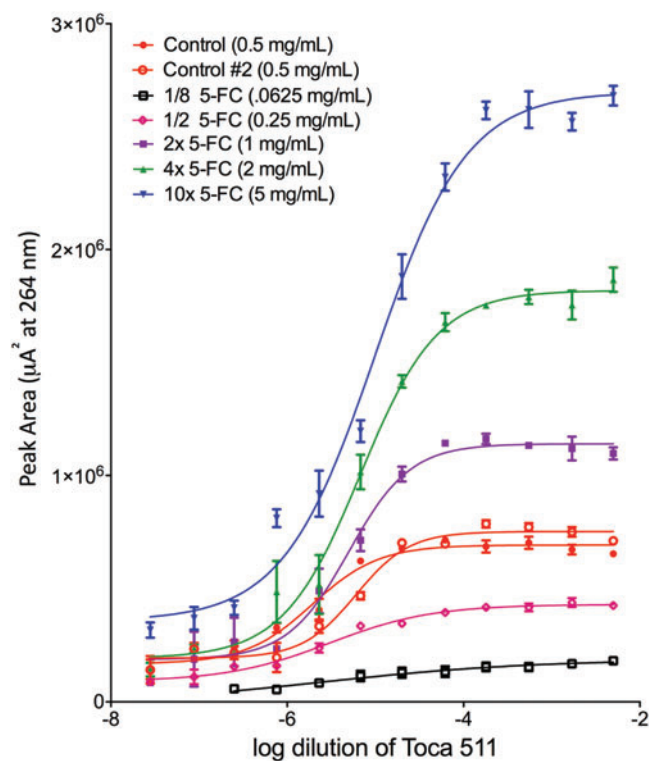

**Supplementary Figure S1.** Toca-511 yCD-mediated production of 5-FU from varying 5-FC and virus concentrations. U-87 cells were transduced with a viral dilution series and 4 days postinfection were incubated with varying 5-FC concentrations. The reaction was terminated 2 hr after 5-FC addition and 5-FU level measured by high performance liquid chromatography. Data are plotted using a 4-parameter fit model with 5-FU peak area plotted against the log value of the Toca 511 dilution series. Decreasing 5-FC concentration resulted in less 5-FU produced while increasing concentrations of 5-FC resulted in more 5-FU being produced regardless of initial virus infection level. Cytosine deaminase protein activity in the assay is limited by the amount of 5-FC available for conversion. 5-FC, 5-fluorocytosine; 5-FU, 5-fluorouracil; yCD, yeast cytosine deaminase.
