# Supplementary material
Source: PubMed Central journal article supplement (PMC4761857)
Supplement: Supp_Fig3.pdf [file Supp_Fig3.pdf]

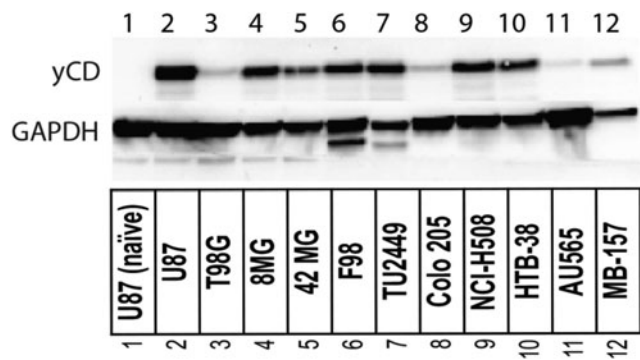

**Supplementary Figure S3.**  $\gamma$ CD Western blot of the 9 human and 2 murine tumor cell lines. An amount of 15  $\mu$ g of total protein was separated by electrophoresis on a 4–12% SDS-polyacrylamide gel at 100 V for 60 min. The resolved proteins were transferred to a nitrocellulose membrane and were probed overnight at 4°C with a mouse anti- $\gamma$ CD monoclonal antibody. The next day, blots were rinsed with TBS-tween (0.05%) and probed with anti-mouse horseradish peroxidase secondary antibody for 1 hr at room temperature before chemiluminescence detection.
